# Supplementary material for: Mining TCGA Database for Genes with Prognostic Value in Breast Cancer
Source: Int J Mol Sci. 2023 Jan 13;24(2):1622. doi: 10.3390/ijms24021622 (PMC9862022; doi:10.3390/ijms24021622)
Supplement: Supplementary file 1 [file ijms-24-01622-s001.zip › ijms-2096481_Suppl-Table S1.xlsx]

## Sheet: listP-up
index	gene	p Value	Survival better if	PP vs GP	5y Survival fraction 33% Lowest	5y Survival fraction Center 33%	5y Survival fraction 33% Highest
1	PGK1	0	Under-expressed	Higher in PP	0.81	0.74	0.44
2	KLRB1	1e-05	Over-Expressed	Lower in PP	0.51	0.68	0.8
3	TRPC7	0.00013	Under-expressed	Higher in PP	0.79	0.67	0.53
4	CHD5	0.00019	Under-expressed	Higher in PP	0.78	0.68	0.53
5	TFPI2	0.00021	Over-Expressed	Lower in PP	0.53	0.68	0.78
6	ADGRE3	0.00028	Over-Expressed	Lower in PP	0.56	0.64	0.79
7	CCND2	0.0003	Over-Expressed	Lower in PP	0.53	0.7	0.76
8	SAV1	0.00031	Over-Expressed	Lower in PP	0.53	0.7	0.76
9	GLIPR1L1	0.00038	Over-Expressed	Lower in PP	0.53	0.7	0.76
10	ADAMTS8	0.00041	Over-Expressed	Lower in PP	0.55	0.67	0.77
11	CYP4F12	0.00043	Over-Expressed	Lower in PP	0.53	0.7	0.76
12	DAPL1	0.00057	Over-Expressed	Lower in PP	0.54	0.68	0.77
13	POP1	0.00063	Under-expressed	Higher in PP	0.75	0.72	0.52
14	FOXE1	0.00065	Over-Expressed	Lower in PP	0.54	0.69	0.76
15	GARS1	0.00076	Under-expressed	Higher in PP	0.76	0.69	0.54
16	NTRK3	0.00077	Over-Expressed	Lower in PP	0.58	0.63	0.78
17	COLGALT2	0.00077	Over-Expressed	Lower in PP	0.55	0.67	0.77
18	LHX1	0.00078	Under-expressed	Higher in PP	0.77	0.68	0.54
19	FGF19	0.0009	Over-Expressed	Lower in PP	0.54	0.69	0.76
20	PLEKHA4	0.00091	Over-Expressed	Lower in PP	0.57	0.64	0.78
21	SHMT2	0.00096	Under-expressed	Higher in PP	0.74	0.73	0.52
22	GLI1	0.00104	Over-Expressed	Lower in PP	0.52	0.74	0.73
23	EIF4E3	0.00108	Over-Expressed	Lower in PP	0.55	0.67	0.77
24	CLEC10A	0.0012	Over-Expressed	Lower in PP	0.55	0.68	0.76
25	ADRB1	0.00142	Over-Expressed	Lower in PP	0.58	0.62	0.79
26	AC114490.3	0.00155	Over-Expressed	Lower in PP	0.56	0.67	0.76
27	C3	0.00157	Over-Expressed	Lower in PP	0.59	0.62	0.78
28	GBP7	0.0016	Over-Expressed	Lower in PP	0.54	0.7	0.75
29	SLC39A7	0.00167	Under-expressed	Higher in PP	0.77	0.65	0.57
30	CA6	0.00194	Over-Expressed	Lower in PP	0.57	0.65	0.77
31	ELOC	0.00195	Under-expressed	Higher in PP	0.75	0.68	0.56
32	ABCB9	0.002	Under-expressed	Higher in PP	0.75	0.68	0.56
33	ITGA10	0.00201	Over-Expressed	Lower in PP	0.57	0.66	0.76
34	SLAIN1	0.00202	Over-Expressed	Lower in PP	0.51	0.77	0.71
35	HMGCLL1	0.00209	Over-Expressed	Lower in PP	0.56	0.66	0.77
36	SYCP3	0.00238	Over-Expressed	Lower in PP	0.56	0.67	0.76
37	TNN	0.00273	Over-Expressed	Lower in PP	0.59	0.63	0.77
38	OR2M4	0.00333	Over-Expressed	Lower in PP	0.59	0.63	0.77
39	WIF1	0.00354	Over-Expressed	Lower in PP	0.59	0.63	0.77
40	CCT5	0.00362	Under-expressed	Higher in PP	0.75	0.67	0.57
41	NACAD	0.00363	Over-Expressed	Lower in PP	0.6	0.61	0.78
42	APOBEC3C	0.00363	Over-Expressed	Lower in PP	0.55	0.69	0.75
43	PROKR2	0.00375	Over-Expressed	Higher in PP	0.58	0.65	0.76
44	C8orf76	0.00378	Under-expressed	Higher in PP	0.74	0.69	0.56
45	C10orf105	0.00385	Over-Expressed	Lower in PP	0.6	0.61	0.78
46	MCTP1	0.00391	Over-Expressed	Lower in PP	0.53	0.75	0.71
47	CRAT	0.00392	Over-Expressed	Higher in PP	0.56	0.68	0.75
48	PZP	0.00393	Over-Expressed	Lower in PP	0.57	0.67	0.75
49	NFATC2	0.00409	Over-Expressed	Lower in PP	0.6	0.61	0.78
50	FCER1A	0.00413	Over-Expressed	Lower in PP	0.57	0.67	0.75
51	MORF4L2	0.00417	Under-expressed	Higher in PP	0.77	0.64	0.58
52	LRRC8C	0.00422	Over-Expressed	Lower in PP	0.58	0.66	0.75
53	IL1RAPL1	0.00431	Over-Expressed	Lower in PP	0.57	0.67	0.75
54	STIP1	0.00438	Under-expressed	Higher in PP	0.75	0.66	0.58
55	HSPH1	0.00459	Under-expressed	Higher in PP	0.76	0.65	0.58
56	CLEC9A	0.00473	Over-Expressed	Lower in PP	0.54	0.73	0.72
57	STEAP1	0.00516	Over-Expressed	Lower in PP	0.53	0.75	0.71
58	HSPA14	0.00522	Under-expressed	Higher in PP	0.75	0.67	0.57
59	GLRA3	0.00524	Over-Expressed	Lower in PP	0.62	0.58	0.79
60	P2RY13	0.00538	Over-Expressed	Lower in PP	0.55	0.7	0.74
61	CACYBP	0.00543	Under-expressed	Higher in PP	0.74	0.68	0.57
62	MROH8	0.00566	Over-Expressed	Lower in PP	0.55	0.71	0.73
63	BEND5	0.00573	Over-Expressed	Lower in PP	0.54	0.72	0.73
64	TNFRSF8	0.00578	Over-Expressed	Lower in PP	0.58	0.65	0.76
65	GRM7	0.00582	Over-Expressed	Lower in PP	0.57	0.68	0.74
66	ALDOA	0.00601	Under-expressed	Higher in PP	0.74	0.67	0.58
67	DIO3	0.00656	Over-Expressed	Lower in PP	0.57	0.67	0.75
68	PROX2	0.00669	Over-Expressed	Lower in PP	0.59	0.65	0.75
69	DLG3	0.00674	Over-Expressed	Higher in PP	0.64	0.54	0.81
70	ETV3L	0.0069	Over-Expressed	Lower in PP	0.56	0.68	0.75
71	UPK2	0.00705	Under-expressed	Higher in PP	0.71	0.75	0.53
72	OR7A5	0.00719	Over-Expressed	Lower in PP	0.59	0.64	0.76
73	STAC2	0.00747	Over-Expressed	Lower in PP	0.63	0.57	0.79
74	AL139353.1	0.00759	Over-Expressed	Lower in PP	0.54	0.73	0.72
75	TAS2R4	0.00788	Over-Expressed	Lower in PP	0.59	0.64	0.76
76	ILF2	0.00797	Under-expressed	Higher in PP	0.71	0.74	0.54
77	APOL6	0.00805	Over-Expressed	Lower in PP	0.56	0.7	0.73
78	PROM2	0.0087	Under-expressed	Higher in PP	0.74	0.68	0.57
79	AK3	0.0087	Over-Expressed	Lower in PP	0.56	0.69	0.74
80	SPINT1	0.00876	Under-expressed	Higher in PP	0.7	0.76	0.53
81	TAGLN2	0.00908	Under-expressed	Higher in PP	0.71	0.73	0.55
82	SPP2	0.0096	Under-expressed	Higher in PP	0.73	0.71	0.55
83	CD8B2	0.0101	Over-Expressed	Lower in PP	0.6	0.63	0.76
84	DZIP1L	0.01029	Over-Expressed	Lower in PP	0.59	0.65	0.75
85	STOX1	0.01043	Over-Expressed	Lower in PP	0.54	0.73	0.72
86	IGSF1	0.01067	Over-Expressed	Lower in PP	0.57	0.68	0.74
87	KRTAP10-1	0.01103	Under-expressed	Higher in PP	0.71	0.75	0.53
88	SLC5A9	0.01128	Over-Expressed	Lower in PP	0.54	0.75	0.7
89	GRAMD1C	0.0116	Over-Expressed	Lower in PP	0.54	0.74	0.71
90	FZD7	0.01192	Over-Expressed	Lower in PP	0.56	0.71	0.72
91	KNOP1	0.01227	Under-expressed	Higher in PP	0.73	0.7	0.56
92	SMIM24	0.01235	Over-Expressed	Lower in PP	0.6	0.63	0.76
93	TLR3	0.01243	Over-Expressed	Lower in PP	0.62	0.6	0.77
94	SERPINF2	0.0128	Over-Expressed	Lower in PP	0.56	0.71	0.72
95	IRS4	0.01287	Over-Expressed	Lower in PP	0.61	0.61	0.77
96	SNCAIP	0.01289	Over-Expressed	Lower in PP	0.59	0.65	0.75
97	GALP	0.01298	Under-expressed	Higher in PP	0.74	0.69	0.56
98	C16orf91	0.01349	Under-expressed	Higher in PP	0.72	0.71	0.56
99	FGL2	0.01383	Over-Expressed	Lower in PP	0.59	0.65	0.75
100	GPR137B	0.01408	Under-expressed	Higher in PP	0.71	0.73	0.55
101	ERRFI1	0.01412	Over-Expressed	Lower in PP	0.59	0.66	0.74
102	SYNE2	0.01429	Over-Expressed	Lower in PP	0.57	0.7	0.72
103	APOL4	0.01431	Over-Expressed	Lower in PP	0.58	0.67	0.74
104	BHMT	0.01475	Over-Expressed	Lower in PP	0.56	0.71	0.72
105	BHLHE41	0.01488	Over-Expressed	Lower in PP	0.6	0.64	0.75
106	TCF7L2	0.01537	Over-Expressed	Lower in PP	0.59	0.67	0.73
107	C11orf91	0.01588	Over-Expressed	Lower in PP	0.59	0.65	0.75
108	ZNF208	0.016	Over-Expressed	Lower in PP	0.59	0.66	0.74
109	CHIT1	0.0161	Over-Expressed	Lower in PP	0.58	0.68	0.73
110	PKHD1	0.01644	Over-Expressed	Lower in PP	0.59	0.66	0.74
111	IYD	0.0169	Under-expressed	Higher in PP	0.7	0.75	0.54
112	CDC14A	0.01718	Over-Expressed	Lower in PP	0.61	0.62	0.76
113	SP6	0.01764	Under-expressed	Higher in PP	0.74	0.66	0.59
114	FRG2	0.01831	Under-expressed	Higher in PP	0.77	0.61	0.61
115	DYNLT1	0.01858	Under-expressed	Higher in PP	0.74	0.65	0.6
116	WNT11	0.01863	Over-Expressed	Lower in PP	0.62	0.6	0.77
117	RIMS1	0.01866	Under-expressed	Higher in PP	0.73	0.69	0.57
118	CYC1	0.01995	Under-expressed	Higher in PP	0.7	0.73	0.56
119	PYGO1	0.02013	Over-Expressed	Lower in PP	0.61	0.63	0.75
120	GOLGA6L4	0.02063	Over-Expressed	Lower in PP	0.6	0.64	0.75
121	MAGI1	0.02164	Over-Expressed	Lower in PP	0.58	0.69	0.72
122	NIBAN1	0.02194	Over-Expressed	Lower in PP	0.6	0.63	0.76
123	GPR45	0.02203	Over-Expressed	Lower in PP	0.59	0.66	0.74
124	AP003071.5	0.02249	Over-Expressed	Lower in PP	0.59	0.65	0.75
125	RPS6KA3	0.02279	Over-Expressed	Lower in PP	0.59	0.67	0.73
126	KLHL33	0.02291	Over-Expressed	Lower in PP	0.62	0.62	0.75
127	TMIGD3	0.02322	Under-expressed	Higher in PP	0.69	0.76	0.54
128	CMTM5	0.02346	Over-Expressed	Lower in PP	0.61	0.63	0.75
129	TXN	0.02347	Under-expressed	Higher in PP	0.72	0.69	0.58
130	CALN1	0.0238	Over-Expressed	Lower in PP	0.61	0.64	0.74
131	GALNT17	0.02417	Over-Expressed	Lower in PP	0.57	0.7	0.72
132	RAET1E	0.02431	Under-expressed	Higher in PP	0.71	0.73	0.55
133	PLCL2	0.02439	Over-Expressed	Lower in PP	0.59	0.68	0.72
134	ARHGAP26	0.02447	Over-Expressed	Lower in PP	0.57	0.71	0.71
135	KCNJ4	0.025	Under-expressed	Higher in PP	0.72	0.7	0.57
136	L3MBTL4	0.02615	Over-Expressed	Lower in PP	0.56	0.72	0.71
137	YWHAZ	0.02696	Under-expressed	Higher in PP	0.7	0.74	0.55
138	KLRC1	0.02713	Over-Expressed	Lower in PP	0.6	0.65	0.74
139	CDH19	0.02747	Over-Expressed	Lower in PP	0.59	0.68	0.72
140	RAI2	0.02753	Over-Expressed	Lower in PP	0.61	0.63	0.75
141	KLK7	0.02756	Over-Expressed	Lower in PP	0.61	0.63	0.75
142	PDE5A	0.02781	Over-Expressed	Lower in PP	0.6	0.66	0.73
143	SELE	0.02824	Over-Expressed	Lower in PP	0.61	0.64	0.74
144	PKDREJ	0.02851	Over-Expressed	Lower in PP	0.61	0.64	0.74
145	VANGL1	0.02863	Under-expressed	Higher in PP	0.74	0.65	0.6
146	ALX1	0.03061	Over-Expressed	Lower in PP	0.58	0.69	0.72
147	LIPJ	0.03073	Over-Expressed	Lower in PP	0.61	0.63	0.75
148	PTGS2	0.03099	Over-Expressed	Lower in PP	0.6	0.66	0.73
149	OGFRL1	0.03101	Over-Expressed	Lower in PP	0.57	0.69	0.73
150	UNC93B1	0.0314	Under-expressed	Higher in PP	0.7	0.72	0.57
151	TMED9	0.03178	Under-expressed	Higher in PP	0.71	0.7	0.58
152	MT-ND1	0.0319	Over-Expressed	Lower in PP	0.55	0.74	0.7
153	SNRPG	0.03217	Under-expressed	Higher in PP	0.71	0.7	0.58
154	CIAO3	0.03253	Under-expressed	Higher in PP	0.74	0.64	0.61
155	ODF2	0.03382	Under-expressed	Higher in PP	0.72	0.69	0.58
156	GALNT16	0.03384	Over-Expressed	Lower in PP	0.61	0.64	0.74
157	TMEM82	0.03421	Over-Expressed	Higher in PP	0.61	0.62	0.76
158	RANGAP1	0.03425	Under-expressed	Higher in PP	0.71	0.72	0.56
159	CAMSAP3	0.03436	Over-Expressed	Higher in PP	0.55	0.74	0.7
160	ARID5A	0.03486	Over-Expressed	Lower in PP	0.56	0.72	0.71
161	GPER1	0.03526	Over-Expressed	Lower in PP	0.59	0.66	0.74
162	BDH2	0.03555	Over-Expressed	Lower in PP	0.58	0.71	0.7
163	CKAP4	0.03702	Under-expressed	Higher in PP	0.73	0.65	0.61
164	FSCN1	0.03784	Under-expressed	Higher in PP	0.76	0.61	0.62
165	FGF9	0.03784	Over-Expressed	Lower in PP	0.61	0.64	0.74
166	TAC1	0.0385	Over-Expressed	Lower in PP	0.63	0.61	0.75
167	RFC3	0.03873	Under-expressed	Higher in PP	0.75	0.63	0.61
168	THOP1	0.03902	Under-expressed	Higher in PP	0.72	0.68	0.59
169	OSBPL1A	0.0396	Over-Expressed	Lower in PP	0.61	0.64	0.74
170	TCHH	0.0412	Under-expressed	Higher in PP	0.71	0.71	0.57
171	DPM2	0.04286	Under-expressed	Higher in PP	0.74	0.63	0.62
172	CD200R1	0.04339	Over-Expressed	Lower in PP	0.59	0.68	0.72
173	SPINDOC	0.04377	Under-expressed	Higher in PP	0.74	0.63	0.62
174	IL22RA1	0.04467	Over-Expressed	Lower in PP	0.55	0.75	0.69
175	FBXO5	0.04474	Under-expressed	Higher in PP	0.74	0.65	0.6
176	HAND1	0.04505	Under-expressed	Higher in PP	0.74	0.64	0.61
177	GPR88	0.04668	Over-Expressed	Lower in PP	0.61	0.65	0.73
178	RAB3D	0.04682	Under-expressed	Higher in PP	0.72	0.68	0.59
179	TANK	0.0471	Over-Expressed	Lower in PP	0.57	0.71	0.71
180	SULT1C4	0.04742	Over-Expressed	Lower in PP	0.59	0.69	0.71
181	ZEB1	0.04889	Over-Expressed	Lower in PP	0.63	0.62	0.74
182	ADAM15	0.05034	Not significant	Higher in PP	0.71	0.69	0.59
183	NLRP1	0.05036	Over-Expressed	Lower in PP	0.64	0.6	0.75
184	AC007192.1	0.05074	Not significant	Higher in PP	0.75	0.62	0.62
185	MRPL47	0.05177	Not significant	Higher in PP	0.71	0.69	0.59
186	TSPO2	0.05251	Over-Expressed	Lower in PP	0.6	0.67	0.72
187	THEM6	0.05258	Not significant	Higher in PP	0.72	0.67	0.6
188	RBP3	0.05326	Over-Expressed	Lower in PP	0.61	0.64	0.74
189	A2M	0.05411	Over-Expressed	Lower in PP	0.62	0.64	0.73
190	TEX14	0.0543	Not significant	Higher in PP	0.74	0.64	0.61
191	KRTAP10-4	0.05456	Not significant	Higher in PP	0.72	0.69	0.58
192	PTRH2	0.05473	Not significant	Higher in PP	0.71	0.69	0.59
193	LHX5	0.05552	Not significant	Higher in PP	0.7	0.72	0.57
194	HDC	0.05617	Over-Expressed	Lower in PP	0.59	0.7	0.7
195	PUF60	0.0569	Not significant	Higher in PP	0.69	0.72	0.58
196	CFAP74	0.05747	Not significant	Higher in PP	0.77	0.57	0.65
197	ST14	0.0577	Not significant	Higher in PP	0.72	0.66	0.61
198	SOX6	0.05818	Over-Expressed	Lower in PP	0.58	0.71	0.7
199	C16orf89	0.05902	Over-Expressed	Lower in PP	0.59	0.68	0.72
200	F11R	0.05904	Not significant	Higher in PP	0.7	0.71	0.58
201	ZNF707	0.05921	Not significant	Higher in PP	0.72	0.67	0.6
202	CYHR1	0.05968	Not significant	Higher in PP	0.72	0.66	0.61
203	MTFR1	0.06201	Not significant	Higher in PP	0.61	0.64	0.74
204	SRPK3	0.06254	Not significant	Higher in PP	0.69	0.74	0.56
205	XKR9	0.0626	Not significant	Higher in PP	0.75	0.61	0.63
206	CTRB1	0.0636	Not significant	Higher in PP	0.74	0.63	0.62
207	BOLA1	0.06375	Not significant	Higher in PP	0.72	0.67	0.6
208	LRRC4B	0.06454	Over-Expressed	Lower in PP	0.63	0.62	0.74
209	TMEM40	0.06473	Not significant	Higher in PP	0.69	0.73	0.57
210	BANK1	0.06476	Over-Expressed	Lower in PP	0.58	0.72	0.69
211	HEY2	0.06501	Over-Expressed	Lower in PP	0.63	0.62	0.74
212	ZMYND19	0.06522	Not significant	Higher in PP	0.71	0.68	0.6
213	KIF17	0.06591	Over-Expressed	Lower in PP	0.61	0.65	0.73
214	ATP6V0A4	0.06724	Not significant	Higher in PP	0.71	0.69	0.59
215	L1CAM	0.06948	Not significant	Higher in PP	0.68	0.74	0.57
216	MOB3C	0.0696	Over-Expressed	Lower in PP	0.58	0.71	0.7
217	INPP1	0.07153	Over-Expressed	Lower in PP	0.59	0.69	0.71
218	UPK1B	0.07173	Under-expressed	Lower in PP	0.75	0.6	0.64
219	ACSM6	0.07197	Over-Expressed	Lower in PP	0.59	0.7	0.7
220	GABRA1	0.07256	Not significant	Higher in PP	0.61	0.66	0.72
221	IL20RA	0.07258	Over-Expressed	Lower in PP	0.61	0.66	0.72
222	BMP8B	0.07278	Not significant	Higher in PP	0.71	0.7	0.58
223	C1orf127	0.07301	Not significant	Higher in PP	0.72	0.67	0.6
224	ZNF668	0.07364	Not significant	Higher in PP	0.76	0.59	0.64
225	PCDHGA1	0.07374	Not significant	Higher in PP	0.72	0.67	0.6
226	HOXA11	0.0745	Not significant	Higher in PP	0.73	0.65	0.61
227	OR10P1	0.07468	Not significant	Higher in PP	0.72	0.69	0.58
228	ARC	0.07494	Over-Expressed	Lower in PP	0.61	0.66	0.72
229	NPTX1	0.07531	Over-Expressed	Lower in PP	0.62	0.64	0.73
230	KRTAP16-1	0.07605	Over-Expressed	Lower in PP	0.65	0.58	0.76
231	CEP85L	0.07675	Over-Expressed	Lower in PP	0.62	0.65	0.72
232	RHBDD3	0.07707	Not significant	Higher in PP	0.71	0.68	0.6
233	EN2	0.0784	Not significant	Higher in PP	0.67	0.77	0.55
234	MIF	0.07888	Not significant	Higher in PP	0.72	0.67	0.6
235	PNP	0.081	Not significant	Higher in PP	0.68	0.75	0.56
236	CEBPE	0.08141	Not significant	Higher in PP	0.69	0.73	0.57
237	CCDC68	0.08173	Over-Expressed	Lower in PP	0.6	0.69	0.7
238	SSNA1	0.08183	Not significant	Higher in PP	0.71	0.67	0.61
239	HMX1	0.08198	Not significant	Higher in PP	0.76	0.58	0.65
240	MRPS23	0.08208	Not significant	Higher in PP	0.71	0.68	0.6
241	PIWIL1	0.08309	Not significant	Higher in PP	0.74	0.64	0.61
242	TBX10	0.08375	Not significant	Higher in PP	0.73	0.65	0.61
243	IVL	0.08438	Not significant	Higher in PP	0.72	0.66	0.61
244	MINAR1	0.08459	Not significant	Higher in PP	0.71	0.7	0.58
245	NTN4	0.08539	Over-Expressed	Lower in PP	0.6	0.67	0.72
246	NAPRT	0.08569	Not significant	Higher in PP	0.74	0.61	0.64
247	FAM124A	0.08572	Over-Expressed	Lower in PP	0.58	0.72	0.69
248	GDAP1	0.08589	Not significant	Higher in PP	0.59	0.69	0.71
249	DHRS3	0.08712	Over-Expressed	Lower in PP	0.6	0.68	0.71
250	BEGAIN	0.08726	Over-Expressed	Lower in PP	0.58	0.73	0.68
251	RGMA	0.08786	Over-Expressed	Lower in PP	0.59	0.7	0.7
252	TBC1D7	0.08809	Not significant	Higher in PP	0.71	0.67	0.61
253	CFLAR	0.0889	Over-Expressed	Lower in PP	0.61	0.67	0.71
254	EPHB6	0.08944	Over-Expressed	Lower in PP	0.58	0.72	0.69
255	DNAJA4	0.09002	Not significant	Higher in PP	0.73	0.65	0.61
256	SRD5A3	0.09086	Not significant	Higher in PP	0.7	0.7	0.59
257	AKAP7	0.0912	Over-Expressed	Lower in PP	0.65	0.58	0.76
258	PIGU	0.09137	Not significant	Higher in PP	0.7	0.69	0.6
259	ME3	0.09144	Over-Expressed	Lower in PP	0.62	0.64	0.73
260	MAP3K8	0.09198	Over-Expressed	Lower in PP	0.59	0.7	0.7
261	NUTM2F	0.09272	Not significant	Higher in PP	0.72	0.66	0.61
262	PDSS1	0.09282	Not significant	Higher in PP	0.72	0.66	0.61
263	WFDC3	0.09284	Not significant	Higher in PP	0.68	0.73	0.58
264	AC090517.4	0.09387	Over-Expressed	Lower in PP	0.62	0.64	0.73
265	PPIAL4A	0.0946	Not significant	Higher in PP	0.7	0.7	0.59
266	MRPL15	0.09546	Not significant	Higher in PP	0.68	0.73	0.58
267	BRI3BP	0.09549	Not significant	Higher in PP	0.71	0.67	0.61
268	SLC13A5	0.09675	Over-Expressed	Lower in PP	0.6	0.68	0.71
269	GRIN2A	0.09758	Over-Expressed	Lower in PP	0.63	0.64	0.72
270	PAICS	0.09791	Not significant	Higher in PP	0.75	0.6	0.64
271	PCDH19	0.09799	Over-Expressed	Lower in PP	0.66	0.58	0.75
272	DAW1	0.098	Over-Expressed	Lower in PP	0.64	0.61	0.74
273	FRMD3	0.09821	Over-Expressed	Lower in PP	0.6	0.69	0.7
274	SCAMP3	0.09922	Not significant	Higher in PP	0.75	0.59	0.65
275	BEND3	0.09945	Not significant	Higher in PP	0.7	0.7	0.59
276	RAG1	0.10021	Over-Expressed	Lower in PP	0.61	0.67	0.71
277	CD276	0.10022	Not significant	Higher in PP	0.71	0.68	0.6
278	SPART	0.10084	Over-Expressed	Lower in PP	0.61	0.66	0.72
279	SLC14A1	0.10208	Over-Expressed	Lower in PP	0.63	0.63	0.73
280	PLPP2	0.10265	Not significant	Higher in PP	0.69	0.72	0.58
281	FAM122A	0.10319	Over-Expressed	Lower in PP	0.57	0.75	0.67
282	ARHGAP19	0.1033	Over-Expressed	Lower in PP	0.63	0.63	0.73
283	C1orf87	0.10445	Over-Expressed	Lower in PP	0.62	0.64	0.73
284	KLHL32	0.1052	Over-Expressed	Lower in PP	0.6	0.69	0.7
285	C2orf73	0.10526	Over-Expressed	Lower in PP	0.59	0.69	0.71
286	CPS1	0.10865	Over-Expressed	Lower in PP	0.58	0.72	0.69
287	P4HA1	0.10882	Not significant	Higher in PP	0.68	0.73	0.58
288	PRDX1	0.10888	Not significant	Higher in PP	0.7	0.68	0.61
289	SHISA3	0.11057	Over-Expressed	Lower in PP	0.58	0.73	0.68
290	HPGDS	0.11098	Over-Expressed	Lower in PP	0.65	0.6	0.74
291	NUP62CL	0.11106	Not significant	Higher in PP	0.69	0.7	0.6
292	SORBS2	0.11264	Over-Expressed	Lower in PP	0.61	0.67	0.71
293	SIRPA	0.1148	Over-Expressed	Lower in PP	0.62	0.65	0.72
294	TCN2	0.1148	Over-Expressed	Lower in PP	0.61	0.67	0.71
295	TIMM13	0.11601	Not significant	Higher in PP	0.71	0.67	0.61
296	NR2C2AP	0.11697	Not significant	Higher in PP	0.7	0.69	0.6
297	HM13	0.11786	Not significant	Higher in PP	0.71	0.66	0.62
298	GOLGA8B	0.11839	Over-Expressed	Lower in PP	0.65	0.59	0.75
299	SLC9A2	0.11914	Not significant	Higher in PP	0.69	0.72	0.58
300	AQP12B	0.11971	Not significant	Higher in PP	0.72	0.66	0.61
301	POLR2H	0.12218	Not significant	Higher in PP	0.71	0.67	0.61
302	UNC13D	0.1223	Not significant	Higher in PP	0.62	0.64	0.73
303	VAV2	0.12407	Not significant	Higher in PP	0.71	0.66	0.62
304	FBXO32	0.12533	Over-Expressed	Lower in PP	0.61	0.68	0.7
305	FKBPL	0.12599	Not significant	Higher in PP	0.71	0.67	0.61
306	VPS28	0.12789	Not significant	Higher in PP	0.66	0.76	0.57
307	RNF165	0.12793	Over-Expressed	Lower in PP	0.58	0.74	0.67
308	BICDL2	0.12984	Not significant	Higher in PP	0.69	0.71	0.59
309	CHRFAM7A	0.13271	Over-Expressed	Lower in PP	0.66	0.58	0.75
310	LHFPL1	0.13363	Over-Expressed	Lower in PP	0.58	0.73	0.68
311	SGCE	0.13459	Over-Expressed	Lower in PP	0.58	0.74	0.67
312	ATP6V1C2	0.13479	Not significant	Higher in PP	0.72	0.65	0.62
313	GCM1	0.13587	Not significant	Higher in PP	0.62	0.65	0.72
314	PLAAT1	0.13691	Not significant	Higher in PP	0.7	0.69	0.6
315	PROK2	0.13958	Over-Expressed	Lower in PP	0.61	0.67	0.71
316	ZNF608	0.14033	Over-Expressed	Lower in PP	0.62	0.67	0.7
317	MAGED1	0.1405	Not significant	Higher in PP	0.72	0.64	0.63
318	ART4	0.14075	Over-Expressed	Lower in PP	0.6	0.7	0.69
319	RAB40C	0.1413	Not significant	Higher in PP	0.74	0.6	0.65
320	CSF3R	0.14291	Not significant	Higher in PP	0.61	0.67	0.71
321	FBLN1	0.14341	Over-Expressed	Lower in PP	0.64	0.61	0.74
322	GSTA2	0.14747	Not significant	Higher in PP	0.7	0.68	0.61
323	KPNA5	0.14765	Over-Expressed	Lower in PP	0.61	0.69	0.69
324	THY1	0.14871	Not significant	Higher in PP	0.73	0.63	0.63
325	CREBRF	0.14872	Over-Expressed	Lower in PP	0.63	0.65	0.71
326	PCDHB2	0.149	Not significant	Higher in PP	0.7	0.68	0.61
327	SULT2B1	0.14954	Not significant	Higher in PP	0.72	0.63	0.64
328	ZNF219	0.14958	Over-Expressed	Lower in PP	0.62	0.65	0.72
329	SCRIB	0.15013	Not significant	Higher in PP	0.7	0.67	0.62
330	CPLX2	0.1516	Not significant	Higher in PP	0.7	0.7	0.59
331	SUGCT	0.15165	Not significant	Higher in PP	0.69	0.7	0.6
332	HAND2	0.15258	Over-Expressed	Lower in PP	0.6	0.71	0.68
333	MFSD12	0.15317	Not significant	Higher in PP	0.71	0.66	0.62
334	ADAMTS7	0.15595	Not significant	Higher in PP	0.69	0.71	0.59
335	PRSS12	0.15623	Over-Expressed	Lower in PP	0.62	0.67	0.7
336	STAP2	0.15702	Not significant	Higher in PP	0.68	0.71	0.6
337	GCSAML	0.15731	Over-Expressed	Lower in PP	0.6	0.72	0.67
338	DNAH1	0.158	Over-Expressed	Lower in PP	0.59	0.72	0.68
339	GAPDH	0.15866	Not significant	Higher in PP	0.71	0.65	0.63
340	PLA2G2A	0.16053	Over-Expressed	Lower in PP	0.57	0.76	0.66
341	COMMD5	0.16081	Not significant	Higher in PP	0.67	0.73	0.59
342	ZNF587	0.16173	Not significant	Higher in PP	0.66	0.58	0.75
343	SMIM38	0.16175	Over-Expressed	Lower in PP	0.63	0.64	0.72
344	SLC19A1	0.16304	Not significant	Higher in PP	0.71	0.65	0.63
345	COL13A1	0.16409	Not significant	Higher in PP	0.69	0.71	0.59
346	CERCAM	0.16459	Not significant	Higher in PP	0.71	0.66	0.62
347	CCR3	0.16483	Not significant	Higher in PP	0.67	0.74	0.58
348	ARL14EPL	0.16534	Over-Expressed	Lower in PP	0.62	0.66	0.71
349	SLC17A3	0.1679	Over-Expressed	Lower in PP	0.65	0.61	0.73
350	KLK15	0.17151	Not significant	Higher in PP	0.71	0.68	0.6
351	FAM178B	0.17276	Not significant	Higher in PP	0.66	0.75	0.58
352	SFXN1	0.17397	Not significant	Higher in PP	0.73	0.61	0.65
353	CSH2	0.17491	Not significant	Higher in PP	0.72	0.65	0.62
354	PDF	0.17616	Not significant	Higher in PP	0.68	0.72	0.59
355	SBSN	0.17729	Not significant	Higher in PP	0.72	0.63	0.64
356	NPHP3	0.17782	Over-Expressed	Lower in PP	0.63	0.65	0.71
357	TMEM140	0.17859	Over-Expressed	Lower in PP	0.64	0.62	0.73
358	CACNG8	0.17888	Not significant	Higher in PP	0.67	0.75	0.57
359	CPNE8	0.18008	Over-Expressed	Lower in PP	0.63	0.66	0.7
360	SMIM5	0.18308	Not significant	Higher in PP	0.71	0.67	0.61
361	GREM1	0.18504	Not significant	Higher in PP	0.72	0.65	0.62
362	CDK2AP2	0.18549	Not significant	Higher in PP	0.68	0.71	0.6
363	NDUFS6	0.18657	Not significant	Higher in PP	0.71	0.65	0.63
364	HMG20B	0.18683	Not significant	Higher in PP	0.7	0.68	0.61
365	CKS1B	0.18729	Not significant	Higher in PP	0.69	0.69	0.61
366	DHRS9	0.18803	Over-Expressed	Lower in PP	0.6	0.7	0.69
367	ZAR1	0.19208	Not significant	Higher in PP	0.71	0.66	0.62
368	GSTA1	0.19376	Over-Expressed	Lower in PP	0.65	0.61	0.73
369	PJVK	0.19396	Over-Expressed	Lower in PP	0.61	0.69	0.69
370	C16orf96	0.19441	Over-Expressed	Lower in PP	0.59	0.72	0.68
371	ALDH6A1	0.19525	Over-Expressed	Lower in PP	0.61	0.69	0.69
372	UGT1A7	0.19534	Under-expressed	Lower in PP	0.71	0.66	0.62
373	CEP126	0.19565	Over-Expressed	Lower in PP	0.62	0.67	0.7
374	LCN8	0.19584	Over-Expressed	Lower in PP	0.64	0.63	0.72
375	ZNF488	0.19926	Over-Expressed	Lower in PP	0.64	0.62	0.73
376	FKBP5	0.20015	Under-expressed	Lower in PP	0.73	0.62	0.64
377	PTHLH	0.20194	Over-Expressed	Lower in PP	0.61	0.69	0.69
378	FZD5	0.20447	Over-Expressed	Lower in PP	0.61	0.68	0.7
379	RPS6KB2	0.20492	Not significant	Higher in PP	0.7	0.67	0.62
380	VPS72	0.20575	Not significant	Higher in PP	0.68	0.71	0.6
381	TEX11	0.20611	Not significant	Higher in PP	0.69	0.71	0.59
382	ARHGAP36	0.20665	Over-Expressed	Lower in PP	0.64	0.64	0.71
383	HSD11B2	0.21037	Not significant	Higher in PP	0.69	0.69	0.61
384	CYP39A1	0.21205	Over-Expressed	Lower in PP	0.63	0.66	0.7
385	LY6H	0.21356	Not significant	Higher in PP	0.7	0.68	0.61
386	HOXC4	0.21363	Not significant	Higher in PP	0.69	0.72	0.58
387	RMDN2	0.21369	Over-Expressed	Lower in PP	0.63	0.65	0.71
388	PM20D2	0.21472	Over-Expressed	Lower in PP	0.58	0.75	0.66
389	KLC2	0.21484	Not significant	Higher in PP	0.72	0.62	0.65
390	RAMP2	0.21515	Over-Expressed	Lower in PP	0.62	0.67	0.7
391	ESRP2	0.21746	Not significant	Higher in PP	0.72	0.63	0.64
392	ARL5C	0.2182	Over-Expressed	Lower in PP	0.62	0.68	0.69
393	C1orf159	0.21859	Not significant	Higher in PP	0.68	0.71	0.6
394	ARFGAP1	0.21865	Not significant	Higher in PP	0.68	0.7	0.61
395	YIF1A	0.21921	Not significant	Higher in PP	0.72	0.62	0.65
396	BDNF	0.22134	Over-Expressed	Lower in PP	0.63	0.66	0.7
397	NLGN4X	0.22138	Over-Expressed	Lower in PP	0.63	0.67	0.69
398	LRRCC1	0.22302	Not significant	Higher in PP	0.7	0.68	0.61
399	CYP4A11	0.22525	Over-Expressed	Lower in PP	0.64	0.63	0.72
400	CLDN18	0.22717	Over-Expressed	Lower in PP	0.66	0.6	0.73
401	MARK1	0.23198	Over-Expressed	Lower in PP	0.62	0.68	0.69
402	SLC2A12	0.23339	Over-Expressed	Lower in PP	0.63	0.66	0.7
403	WTIP	0.23473	Over-Expressed	Lower in PP	0.62	0.68	0.69
404	ATOH1	0.23489	Not significant	Higher in PP	0.72	0.63	0.64
405	C8orf34	0.2353	Over-Expressed	Lower in PP	0.64	0.65	0.7
406	PADI4	0.23586	Over-Expressed	Lower in PP	0.64	0.64	0.71
407	INSM1	0.23661	Not significant	Higher in PP	0.61	0.69	0.69
408	NLGN3	0.23775	Over-Expressed	Lower in PP	0.6	0.72	0.67
409	BRCA1	0.23813	Not significant	Higher in PP	0.72	0.62	0.65
410	SEPTIN10	0.23875	Over-Expressed	Lower in PP	0.62	0.67	0.7
411	SMARCA4	0.23881	Not significant	Higher in PP	0.69	0.68	0.62
412	LPAR6	0.23991	Over-Expressed	Lower in PP	0.61	0.71	0.67
413	KRT78	0.24061	Not significant	Higher in PP	0.68	0.71	0.6
414	IL13	0.24188	Over-Expressed	Lower in PP	0.63	0.65	0.71
415	LIG1	0.24302	Not significant	Higher in PP	0.7	0.66	0.63
416	TMEM221	0.24476	Over-Expressed	Lower in PP	0.61	0.68	0.7
417	TMPRSS11A	0.24491	Over-Expressed	Lower in PP	0.62	0.68	0.69
418	MYL7	0.24649	Over-Expressed	Lower in PP	0.63	0.67	0.69
419	CLTC	0.24852	Not significant	Higher in PP	0.69	0.69	0.61
420	NT5DC2	0.24978	Not significant	Higher in PP	0.67	0.73	0.59
421	ARPC5L	0.2499	Not significant	Higher in PP	0.69	0.67	0.63
422	SHISA2	0.25088	Not significant	Higher in PP	0.59	0.75	0.65
423	FAM240A	0.25116	Over-Expressed	Lower in PP	0.65	0.62	0.72
424	RPL26L1	0.25122	Not significant	Higher in PP	0.69	0.68	0.62
425	OR2T6	0.25216	Under-expressed	Lower in PP	0.69	0.7	0.6
426	HTR3A	0.25314	Not significant	Higher in PP	0.6	0.71	0.68
427	MIA	0.25581	Over-Expressed	Lower in PP	0.63	0.66	0.7
428	BLID	0.25702	Under-expressed	Lower in PP	0.7	0.68	0.61
429	HENMT1	0.25777	Not significant	Higher in PP	0.69	0.68	0.62
430	LIX1L	0.25811	Over-Expressed	Lower in PP	0.61	0.7	0.68
431	DMRTC2	0.26254	Not significant	Higher in PP	0.68	0.72	0.59
432	MFSD10	0.26436	Not significant	Higher in PP	0.7	0.66	0.63
433	PROCR	0.26443	Over-Expressed	Lower in PP	0.63	0.66	0.7
434	LYSMD4	0.2663	Over-Expressed	Lower in PP	0.62	0.68	0.69
435	GIPC1	0.26699	Not significant	Higher in PP	0.68	0.69	0.62
436	PDZK1IP1	0.26842	Not significant	Higher in PP	0.7	0.66	0.63
437	TPI1	0.26911	Not significant	Higher in PP	0.71	0.63	0.65
438	LIPN	0.27444	Over-Expressed	Lower in PP	0.65	0.62	0.72
439	RTL5	0.27484	Under-expressed	Lower in PP	0.7	0.66	0.63
440	MAGEA10	0.27508	Not significant	Higher in PP	0.72	0.63	0.64
441	TRABD	0.27559	Not significant	Higher in PP	0.72	0.62	0.65
442	KBTBD11	0.27602	Over-Expressed	Lower in PP	0.64	0.64	0.71
443	PCDHA8	0.27804	Not significant	Higher in PP	0.69	0.68	0.62
444	ARHGAP31	0.27963	Over-Expressed	Lower in PP	0.66	0.61	0.72
445	KLHL17	0.28673	Not significant	Higher in PP	0.7	0.66	0.63
446	NME4	0.28744	Not significant	Higher in PP	0.7	0.66	0.63
447	STK26	0.28823	Not significant	Higher in PP	0.72	0.61	0.66
448	S100A8	0.29106	Not significant	Higher in PP	0.7	0.66	0.63
449	SUCNR1	0.29399	Over-Expressed	Lower in PP	0.63	0.67	0.69
450	NR1H4	0.2962	Under-expressed	Lower in PP	0.73	0.62	0.64
451	DEFB118	0.29856	Under-expressed	Lower in PP	0.71	0.65	0.63
452	E2F3	0.29944	Not significant	Higher in PP	0.67	0.73	0.59
453	PSD	0.30055	Not significant	Higher in PP	0.65	0.63	0.71
454	GAS7	0.30456	Over-Expressed	Lower in PP	0.68	0.58	0.73
455	PYCR2	0.3069	Not significant	Higher in PP	0.71	0.63	0.65
456	RPS6KA2	0.30787	Under-expressed	Lower in PP	0.71	0.64	0.64
457	MAD2L2	0.30848	Not significant	Higher in PP	0.6	0.71	0.68
458	AC008764.4	0.30945	Not significant	Higher in PP	0.7	0.67	0.62
459	TRERF1	0.31	Not significant	Higher in PP	0.66	0.74	0.59
460	UBQLN4	0.3111	Not significant	Higher in PP	0.71	0.64	0.64
461	KRTAP4-9	0.31333	Not significant	Higher in PP	0.69	0.68	0.62
462	NDUFB9	0.31502	Not significant	Higher in PP	0.68	0.7	0.61
463	MSLN	0.31648	Not significant	Higher in PP	0.69	0.67	0.63
464	MUSK	0.31717	Over-Expressed	Lower in PP	0.61	0.71	0.67
465	ARHGAP40	0.31723	Over-Expressed	Lower in PP	0.63	0.68	0.68
466	STX19	0.32215	Over-Expressed	Lower in PP	0.63	0.66	0.7
467	JOSD2	0.32741	Not significant	Higher in PP	0.68	0.69	0.62
468	DISP2	0.32895	Not significant	Higher in PP	0.68	0.69	0.62
469	CPN2	0.32898	Not significant	Higher in PP	0.68	0.7	0.61
470	HRH4	0.33082	Over-Expressed	Lower in PP	0.64	0.65	0.7
471	ADH7	0.33357	Under-expressed	Lower in PP	0.7	0.66	0.63
472	TCTEX1D2	0.33808	Not significant	Higher in PP	0.69	0.66	0.64
473	CER1	0.34285	Over-Expressed	Lower in PP	0.67	0.61	0.71
474	CCDC27	0.34525	Over-Expressed	Lower in PP	0.66	0.61	0.72
475	THOC3	0.34733	Not significant	Higher in PP	0.73	0.59	0.67
476	TRIM51	0.34747	Not significant	Higher in PP	0.69	0.69	0.61
477	GGT1	0.3477	Not significant	Higher in PP	0.66	0.72	0.61
478	TMSB15B	0.35005	Not significant	Higher in PP	0.68	0.7	0.61
479	POU6F2	0.35027	Over-Expressed	Lower in PP	0.65	0.64	0.7
480	KLRF1	0.35368	Over-Expressed	Lower in PP	0.65	0.64	0.7
481	DRD1	0.3559	Over-Expressed	Lower in PP	0.64	0.67	0.68
482	TSGA10IP	0.36008	Not significant	Higher in PP	0.69	0.66	0.64
483	GUK1	0.36321	Not significant	Higher in PP	0.69	0.66	0.64
484	GSR	0.36392	Not significant	Higher in PP	0.71	0.62	0.66
485	MAGEA9B	0.36581	Not significant	Higher in PP	0.69	0.68	0.62
486	CDCP1	0.36783	Not significant	Higher in PP	0.69	0.65	0.65
487	SV2C	0.36855	Under-expressed	Lower in PP	0.66	0.74	0.59
488	LRP4	0.36943	Over-Expressed	Lower in PP	0.67	0.6	0.72
489	PPM1H	0.37241	Not significant	Higher in PP	0.68	0.69	0.62
490	TMEM200B	0.37261	Over-Expressed	Lower in PP	0.62	0.69	0.68
491	PCDHGB1	0.37625	Not significant	Higher in PP	0.68	0.7	0.61
492	CDK5R2	0.37634	Not significant	Higher in PP	0.68	0.69	0.62
493	IL36A	0.37672	Over-Expressed	Lower in PP	0.65	0.64	0.7
494	EPHB2	0.38352	Not significant	Higher in PP	0.69	0.67	0.63
495	SEMA5B	0.38445	Not significant	Higher in PP	0.73	0.59	0.67
496	MEIS1	0.38488	Over-Expressed	Lower in PP	0.64	0.66	0.69
497	RNF217	0.38576	Over-Expressed	Lower in PP	0.62	0.71	0.66
498	CACNA2D2	0.38813	Not significant	Higher in PP	0.63	0.67	0.69
499	CBY3	0.38839	Not significant	Higher in PP	0.72	0.62	0.65
500	PTP4A3	0.39019	Not significant	Higher in PP	0.67	0.7	0.62
501	FOXI2	0.39477	Over-Expressed	Lower in PP	0.65	0.64	0.7
502	SLC30A3	0.39506	Not significant	Higher in PP	0.59	0.74	0.66
503	BEND7	0.39694	Over-Expressed	Lower in PP	0.6	0.75	0.64
504	TIGD5	0.39709	Not significant	Higher in PP	0.68	0.67	0.64
505	LSM7	0.40551	Not significant	Higher in PP	0.65	0.74	0.6
506	SHARPIN	0.40554	Not significant	Higher in PP	0.63	0.77	0.59
507	PSG4	0.40729	Over-Expressed	Lower in PP	0.64	0.66	0.69
508	OR14C36	0.40784	Under-expressed	Lower in PP	0.7	0.65	0.64
509	PNPLA1	0.41302	Not significant	Higher in PP	0.69	0.67	0.63
510	FIGNL2	0.41698	Over-Expressed	Lower in PP	0.66	0.62	0.71
511	SLC5A12	0.41705	Not significant	Higher in PP	0.7	0.66	0.63
512	KRT13	0.41892	Over-Expressed	Lower in PP	0.65	0.63	0.71
513	TMEM210	0.41905	Not significant	Higher in PP	0.68	0.68	0.63
514	P3H3	0.41972	Not significant	Higher in PP	0.69	0.67	0.63
515	NTS	0.41972	Over-Expressed	Lower in PP	0.64	0.66	0.69
516	SBF2	0.42064	Over-Expressed	Lower in PP	0.64	0.67	0.68
517	SKA2	0.421	Not significant	Higher in PP	0.71	0.62	0.66
518	ADRM1	0.42495	Not significant	Higher in PP	0.67	0.69	0.63
519	LCAT	0.4261	Over-Expressed	Lower in PP	0.63	0.68	0.68
520	CDH2	0.42643	Not significant	Higher in PP	0.69	0.67	0.63
521	GNG3	0.42725	Not significant	Higher in PP	0.63	0.67	0.69
522	ENAH	0.42876	Not significant	Higher in PP	0.66	0.73	0.6
523	CA5A	0.42878	Not significant	Higher in PP	0.69	0.66	0.64
524	C12orf42	0.42975	Not significant	Higher in PP	0.62	0.7	0.67
525	DUSP23	0.42994	Not significant	Higher in PP	0.67	0.7	0.62
526	ITGA11	0.42996	Not significant	Higher in PP	0.7	0.65	0.64
527	DEUP1	0.43069	Not significant	Higher in PP	0.69	0.66	0.64
528	PRG2	0.43089	Over-Expressed	Lower in PP	0.65	0.65	0.69
529	LRCOL1	0.43818	Over-Expressed	Lower in PP	0.63	0.68	0.68
530	HSD17B3	0.442	Under-expressed	Lower in PP	0.71	0.63	0.65
531	RRAS2	0.44294	Over-Expressed	Lower in PP	0.64	0.66	0.69
532	RFX2	0.45081	Over-Expressed	Lower in PP	0.63	0.68	0.68
533	UQCC3	0.45382	Not significant	Higher in PP	0.7	0.63	0.66
534	DHRS2	0.45562	Not significant	Higher in PP	0.63	0.68	0.68
535	LIPF	0.45678	Over-Expressed	Lower in PP	0.68	0.59	0.72
536	CRB1	0.46497	Over-Expressed	Lower in PP	0.65	0.64	0.7
537	AJAP1	0.46599	Over-Expressed	Lower in PP	0.67	0.62	0.7
538	SPATA21	0.46712	Under-expressed	Lower in PP	0.68	0.68	0.63
539	AP001453.3	0.46846	Not significant	Higher in PP	0.69	0.66	0.64
540	KASH5	0.46895	Not significant	Higher in PP	0.63	0.68	0.68
541	DPEP3	0.46907	Over-Expressed	Lower in PP	0.61	0.71	0.67
542	ACTL6A	0.4694	Not significant	Higher in PP	0.68	0.68	0.63
543	LGALS16	0.46969	Under-expressed	Lower in PP	0.7	0.64	0.65
544	BRMS1	0.47209	Not significant	Higher in PP	0.68	0.66	0.65
545	ABCC5	0.47324	Not significant	Higher in PP	0.68	0.67	0.64
546	HGD	0.47558	Not significant	Higher in PP	0.66	0.62	0.71
547	TELO2	0.476	Not significant	Higher in PP	0.67	0.69	0.63
548	AC090004.1	0.47666	Over-Expressed	Lower in PP	0.68	0.6	0.71
549	GNB1L	0.47891	Not significant	Higher in PP	0.69	0.65	0.65
550	PSMB4	0.48216	Not significant	Higher in PP	0.67	0.69	0.63
551	CYBA	0.48256	Not significant	Higher in PP	0.68	0.68	0.63
552	PAQR5	0.48542	Not significant	Higher in PP	0.65	0.73	0.61
553	OR4D6	0.48942	Under-expressed	Lower in PP	0.68	0.69	0.62
554	HS3ST6	0.49328	Not significant	Higher in PP	0.65	0.72	0.62
555	LYNX1-SLURP2	0.49376	Not significant	Higher in PP	0.66	0.71	0.62
556	B3GAT3	0.49394	Not significant	Higher in PP	0.71	0.61	0.67
557	TRPC5	0.50203	Under-expressed	Lower in PP	0.68	0.68	0.63
558	CFP	0.50615	Over-Expressed	Lower in PP	0.66	0.62	0.71
559	GRID2	0.50633	Over-Expressed	Lower in PP	0.66	0.63	0.7
560	LRIT1	0.51158	Under-expressed	Lower in PP	0.68	0.69	0.62
561	MYADM	0.51277	Under-expressed	Lower in PP	0.72	0.6	0.67
562	TRNP1	0.51296	Under-expressed	Lower in PP	0.67	0.69	0.63
563	FAM177B	0.51381	Not significant	Higher in PP	0.62	0.69	0.68
564	DAPK2	0.51922	Over-Expressed	Lower in PP	0.63	0.69	0.67
565	FAM205A	0.5202	Over-Expressed	Lower in PP	0.67	0.6	0.72
566	SERPINH1	0.52129	Not significant	Higher in PP	0.68	0.66	0.65
567	ZNF556	0.52362	Not significant	Higher in PP	0.61	0.74	0.64
568	DNMT1	0.52446	Not significant	Higher in PP	0.67	0.7	0.62
569	TRIM75P	0.52543	Over-Expressed	Lower in PP	0.64	0.66	0.69
570	DYNC2H1	0.52557	Over-Expressed	Lower in PP	0.66	0.64	0.69
571	RSPO2	0.52614	Not significant	Higher in PP	0.71	0.63	0.65
572	TASOR2	0.52738	Not significant	Higher in PP	0.68	0.67	0.64
573	ANTXRL	0.53307	Over-Expressed	Lower in PP	0.64	0.67	0.68
574	LYPD4	0.53437	Not significant	Higher in PP	0.67	0.7	0.62
575	SFTPA1	0.5375	Over-Expressed	Lower in PP	0.67	0.61	0.71
576	PABPC5	0.53842	Over-Expressed	Lower in PP	0.66	0.64	0.69
577	CCL2	0.54138	Over-Expressed	Lower in PP	0.65	0.65	0.69
578	PRODH	0.54519	Not significant	Higher in PP	0.63	0.7	0.66
579	LINGO2	0.54538	Over-Expressed	Lower in PP	0.66	0.64	0.69
580	GALK1	0.54617	Not significant	Higher in PP	0.67	0.68	0.64
581	INCENP	0.54877	Not significant	Higher in PP	0.74	0.55	0.7
582	MICOS10-NBL1	0.55403	Over-Expressed	Lower in PP	0.64	0.68	0.67
583	ZNF883	0.55707	Under-expressed	Lower in PP	0.69	0.67	0.63
584	NGEF	0.5605	Not significant	Higher in PP	0.65	0.72	0.62
585	INTS6L	0.56688	Over-Expressed	Lower in PP	0.65	0.66	0.68
586	DEFB134	0.57971	Not significant	Higher in PP	0.66	0.72	0.61
587	PCDHA11	0.58135	Not significant	Higher in PP	0.67	0.7	0.62
588	TMPRSS11F	0.58332	Over-Expressed	Lower in PP	0.63	0.7	0.66
589	PCDHA5	0.58464	Not significant	Higher in PP	0.69	0.65	0.65
590	R3HDML	0.58652	Not significant	Higher in PP	0.68	0.6	0.71
591	TFAP2B	0.59351	Not significant	Higher in PP	0.67	0.71	0.61
592	RFX6	0.59545	Over-Expressed	Lower in PP	0.66	0.64	0.69
593	CIB1	0.59862	Not significant	Higher in PP	0.64	0.66	0.69
594	KCNJ8	0.60315	Under-expressed	Lower in PP	0.66	0.71	0.62
595	AQP12A	0.60752	Not significant	Higher in PP	0.7	0.64	0.65
596	PLEKHF2	0.60811	Not significant	Higher in PP	0.66	0.7	0.63
597	TEX13D	0.61396	Over-Expressed	Lower in PP	0.67	0.64	0.68
598	DPP10	0.61609	Not significant	Higher in PP	0.71	0.62	0.66
599	NUBP2	0.61669	Not significant	Higher in PP	0.66	0.64	0.69
600	DKK4	0.6179	Over-Expressed	Lower in PP	0.66	0.64	0.69
601	OR2A25	0.61869	Under-expressed	Lower in PP	0.69	0.64	0.66
602	RNF17	0.62273	Under-expressed	Lower in PP	0.67	0.69	0.63
603	IGSF5	0.62338	Not significant	Higher in PP	0.67	0.68	0.64
604	CTSV	0.62665	Not significant	Higher in PP	0.66	0.69	0.64
605	ISL1	0.63145	Over-Expressed	Lower in PP	0.67	0.63	0.69
606	NANS	0.63427	Not significant	Higher in PP	0.64	0.68	0.67
607	EXD1	0.64429	Not significant	Higher in PP	0.7	0.62	0.67
608	RNF187	0.64672	Not significant	Higher in PP	0.68	0.65	0.66
609	NIM1K	0.64714	Not significant	Higher in PP	0.7	0.63	0.66
610	AQP3	0.64894	Not significant	Higher in PP	0.68	0.66	0.65
611	TP53INP1	0.65005	Not significant	Higher in PP	0.67	0.68	0.64
612	IQCF1	0.65045	Over-Expressed	Lower in PP	0.7	0.57	0.72
613	ZNF462	0.65139	Under-expressed	Lower in PP	0.7	0.63	0.66
614	FAM174C	0.65177	Not significant	Higher in PP	0.69	0.63	0.67
615	AC010547.4	0.65181	Over-Expressed	Lower in PP	0.69	0.59	0.71
616	ATP8A2	0.65731	Not significant	Higher in PP	0.7	0.63	0.66
617	EPPIN	0.66737	Over-Expressed	Lower in PP	0.65	0.66	0.68
618	BPIFA2	0.67664	Not significant	Higher in PP	0.64	0.74	0.61
619	TP53TG3	0.67733	Over-Expressed	Lower in PP	0.66	0.65	0.68
620	IL22RA2	0.67743	Over-Expressed	Lower in PP	0.63	0.7	0.66
621	LHX9	0.67884	Not significant	Higher in PP	0.64	0.74	0.61
622	ATP2B4	0.68147	Over-Expressed	Lower in PP	0.64	0.68	0.67
623	FAIM2	0.68358	Not significant	Higher in PP	0.67	0.64	0.68
624	ALDH3B2	0.6881	Not significant	Higher in PP	0.67	0.67	0.65
625	APBA2	0.68822	Not significant	Higher in PP	0.69	0.63	0.67
626	POMK	0.68855	Not significant	Higher in PP	0.65	0.72	0.62
627	PPP1R14C	0.6898	Not significant	Higher in PP	0.6	0.75	0.64
628	TRIM40	0.69204	Under-expressed	Lower in PP	0.69	0.64	0.66
629	KYNU	0.69252	Not significant	Higher in PP	0.64	0.74	0.61
630	STC1	0.69589	Not significant	Higher in PP	0.68	0.66	0.65
631	ACER2	0.69678	Over-Expressed	Lower in PP	0.65	0.67	0.67
632	OR1J1	0.69738	Not significant	Higher in PP	0.65	0.68	0.66
633	NLRP12	0.69879	Not significant	Higher in PP	0.73	0.56	0.7
634	DPYSL4	0.69885	Not significant	Higher in PP	0.64	0.69	0.66
635	CGAS	0.69996	Not significant	Higher in PP	0.7	0.62	0.67
636	PAGE4	0.7003	Under-expressed	Lower in PP	0.68	0.66	0.65
637	TNNI3K	0.7013	Over-Expressed	Lower in PP	0.68	0.62	0.69
638	LTBP2	0.70234	Over-Expressed	Lower in PP	0.71	0.56	0.72
639	ISOC2	0.70602	Not significant	Higher in PP	0.67	0.68	0.64
640	TMCC3	0.71002	Over-Expressed	Lower in PP	0.63	0.71	0.65
641	OR2L8	0.71305	Under-expressed	Lower in PP	0.68	0.66	0.65
642	ARPC4-TTLL3	0.71413	Under-expressed	Lower in PP	0.71	0.61	0.67
643	ESRRB	0.7182	Under-expressed	Lower in PP	0.7	0.62	0.67
644	ATP4B	0.71838	Not significant	Higher in PP	0.7	0.63	0.66
645	ACSL4	0.72171	Over-Expressed	Lower in PP	0.65	0.67	0.67
646	ZDHHC22	0.72481	Not significant	Higher in PP	0.7	0.61	0.68
647	HEYL	0.72584	Not significant	Higher in PP	0.71	0.6	0.68
648	PSG7	0.72848	Under-expressed	Lower in PP	0.69	0.64	0.66
649	FGFR1	0.72946	Over-Expressed	Lower in PP	0.67	0.63	0.69
650	CYP2C18	0.72981	Under-expressed	Lower in PP	0.7	0.6	0.69
651	PRKCG	0.7302	Not significant	Higher in PP	0.64	0.69	0.66
652	OR7G3	0.73126	Under-expressed	Lower in PP	0.68	0.66	0.65
653	TTC7B	0.73188	Over-Expressed	Lower in PP	0.64	0.69	0.66
654	IL5	0.73189	Over-Expressed	Lower in PP	0.67	0.62	0.7
655	YBX3	0.73237	Over-Expressed	Lower in PP	0.63	0.71	0.65
656	SLC30A8	0.73338	Not significant	Higher in PP	0.67	0.67	0.65
657	PSG2	0.73355	Under-expressed	Lower in PP	0.68	0.66	0.65
658	EIF4EBP2	0.73439	Over-Expressed	Lower in PP	0.66	0.65	0.68
659	LIPC	0.74633	Over-Expressed	Lower in PP	0.63	0.72	0.64
660	WDR24	0.75062	Not significant	Higher in PP	0.7	0.6	0.69
661	CRYGD	0.75297	Under-expressed	Lower in PP	0.67	0.68	0.64
662	CLEC4M	0.754	Under-expressed	Lower in PP	0.66	0.69	0.64
663	RRP1	0.75813	Not significant	Higher in PP	0.63	0.74	0.62
664	GAL3ST3	0.76049	Over-Expressed	Lower in PP	0.64	0.69	0.66
665	OR1L3	0.7621	Under-expressed	Lower in PP	0.69	0.64	0.66
666	NRK	0.76291	Not significant	Higher in PP	0.64	0.74	0.61
667	RCN3	0.76415	Not significant	Higher in PP	0.64	0.73	0.62
668	LYPD3	0.76476	Not significant	Higher in PP	0.62	0.75	0.62
669	PLSCR5	0.76655	Under-expressed	Lower in PP	0.68	0.65	0.66
670	ANKRD63	0.76762	Not significant	Higher in PP	0.7	0.62	0.67
671	ADAMTS3	0.76972	Under-expressed	Lower in PP	0.69	0.64	0.66
672	OR11A1	0.77021	Under-expressed	Lower in PP	0.67	0.68	0.64
673	PHEX	0.77676	Not significant	Higher in PP	0.68	0.65	0.66
674	MSRA	0.77729	Over-Expressed	Lower in PP	0.66	0.66	0.67
675	P3H1	0.78652	Not significant	Higher in PP	0.67	0.66	0.66
676	SATL1	0.78657	Not significant	Higher in PP	0.67	0.67	0.65
677	ZNF391	0.79063	Under-expressed	Lower in PP	0.7	0.62	0.67
678	MRPL17	0.79268	Not significant	Higher in PP	0.65	0.66	0.68
679	BMF	0.79297	Not significant	Higher in PP	0.65	0.71	0.63
680	ANKRD33	0.79333	Under-expressed	Lower in PP	0.68	0.66	0.65
681	MYDGF	0.79439	Not significant	Higher in PP	0.66	0.66	0.67
682	PCED1B	0.79782	Not significant	Higher in PP	0.72	0.57	0.7
683	EYA4	0.79857	Under-expressed	Lower in PP	0.69	0.64	0.66
684	C9orf57	0.79886	Over-Expressed	Lower in PP	0.7	0.58	0.71
685	TAS2R9	0.80169	Under-expressed	Lower in PP	0.68	0.66	0.65
686	KRTAP5-4	0.80173	Not significant	Higher in PP	0.66	0.69	0.64
687	AP2S1	0.80659	Not significant	Higher in PP	0.65	0.71	0.63
688	KDM5B	0.80708	Not significant	Higher in PP	0.64	0.73	0.62
689	SLC1A2	0.80801	Not significant	Higher in PP	0.68	0.65	0.66
690	C21orf62	0.811	Under-expressed	Lower in PP	0.67	0.66	0.66
691	LDHAL6A	0.81159	Over-Expressed	Lower in PP	0.67	0.65	0.67
692	RETN	0.81297	Not significant	Higher in PP	0.69	0.59	0.71
693	TXNDC2	0.81577	Not significant	Higher in PP	0.63	0.76	0.6
694	MT-ND5	0.81596	Over-Expressed	Lower in PP	0.65	0.68	0.66
695	DPRX	0.81773	Under-expressed	Lower in PP	0.7	0.61	0.68
696	C11orf86	0.82455	Not significant	Higher in PP	0.69	0.63	0.67
697	MC5R	0.82596	Not significant	Higher in PP	0.66	0.68	0.65
698	KRT27	0.8291	Over-Expressed	Lower in PP	0.68	0.63	0.68
699	SLC35G3	0.83169	Under-expressed	Lower in PP	0.71	0.6	0.68
700	PCDHA7	0.83321	Not significant	Higher in PP	0.69	0.62	0.68
701	SSTR5	0.84747	Not significant	Higher in PP	0.67	0.66	0.66
702	GCK	0.84818	Under-expressed	Lower in PP	0.66	0.68	0.65
703	HPD	0.85394	Under-expressed	Lower in PP	0.71	0.58	0.7
704	NCAPD2	0.86142	Not significant	Higher in PP	0.69	0.6	0.7
705	SESN1	0.86309	Under-expressed	Lower in PP	0.68	0.66	0.65
706	TMEM198	0.86328	Not significant	Higher in PP	0.61	0.78	0.6
707	EPOP	0.86403	Not significant	Higher in PP	0.65	0.7	0.64
708	DEPDC7	0.86622	Not significant	Higher in PP	0.68	0.64	0.67
709	SDCBP2	0.86695	Not significant	Higher in PP	0.65	0.69	0.65
710	CERS6	0.86727	Not significant	Higher in PP	0.65	0.7	0.64
711	KRTAP1-1	0.86923	Over-Expressed	Lower in PP	0.68	0.62	0.69
712	SCNM1	0.87269	Not significant	Higher in PP	0.66	0.65	0.68
713	MGAT4C	0.88093	Over-Expressed	Lower in PP	0.62	0.73	0.64
714	RAB39A	0.88687	Not significant	Higher in PP	0.68	0.65	0.66
715	HTR1E	0.89085	Not significant	Higher in PP	0.65	0.67	0.67
716	SLC17A1	0.8958	Under-expressed	Lower in PP	0.68	0.64	0.67
717	ASRGL1	0.89776	Not significant	Higher in PP	0.66	0.69	0.64
718	MEIG1	0.90557	Not significant	Higher in PP	0.63	0.72	0.64
719	COL8A1	0.90858	Not significant	Higher in PP	0.64	0.71	0.64
720	FDX2	0.92301	Not significant	Higher in PP	0.67	0.65	0.67
721	PTMS	0.92379	Not significant	Higher in PP	0.7	0.6	0.69
722	SPATA12	0.92653	Not significant	Higher in PP	0.63	0.72	0.64
723	ACBD7	0.92787	Not significant	Higher in PP	0.67	0.66	0.66
724	C1QTNF12	0.92825	Not significant	Higher in PP	0.63	0.72	0.64
725	HBZ	0.93448	Over-Expressed	Lower in PP	0.68	0.62	0.69
726	NAA10	0.93875	Not significant	Higher in PP	0.65	0.67	0.67
727	KRT26	0.94391	Under-expressed	Lower in PP	0.66	0.69	0.64
728	ADAMTS17	0.94577	Not significant	Higher in PP	0.64	0.72	0.63
729	GPR50	0.94701	Under-expressed	Lower in PP	0.69	0.62	0.68
730	LYPLA2	0.94856	Not significant	Higher in PP	0.63	0.71	0.65
731	DNPH1	0.95381	Not significant	Higher in PP	0.68	0.63	0.68
732	ONECUT1	0.95819	Not significant	Higher in PP	0.69	0.61	0.69
733	MDGA2	0.96606	Not significant	Higher in PP	0.66	0.67	0.66
734	HMGCS2	0.96633	Over-Expressed	Lower in PP	0.68	0.63	0.68
735	HOXD4	0.97432	Under-expressed	Lower in PP	0.68	0.64	0.67
736	IGFL1	0.97459	Not significant	Higher in PP	0.62	0.74	0.63
737	PPP1R1C	0.97512	Not significant	Higher in PP	0.65	0.69	0.65
738	AC008750.7	0.97719	Under-expressed	Lower in PP	0.67	0.66	0.66
739	CLCN4	0.9937	Under-expressed	Lower in PP	0.64	0.72	0.63
740	MROH7-TTC4	0.99603	Under-expressed	Lower in PP	0.72	0.56	0.71
741	TAS1R1	0.99712	Over-Expressed	Lower in PP	0.65	0.69	0.65
742	PF4V1	0.99997	Under-expressed	Lower in PP	0.67	0.66	0.66
